# Supplementary material for: High fat diet-induced changes of mouse hepatic transcription and enhancer activity can be reversed by subsequent weight loss
Source: PubMed Central journal article supplement (PMC5223143; doi:10.1038/srep40220), 2017-01-10
Supplement: srep40220-s1.pdf [file srep40220-s1.pdf]

## Supplementary information

**High fat diet-induced changes of mouse hepatic transcription and enhancer activity can be reversed by subsequent weight loss**

Majken Siersbæk, Lyuba Varticovski, Shutong Yang, Songjoon Baek, Ronni Nielsen, Susanne Mandrup, Gordon L. Hager, Jay H. Chung, Lars Grøntved

**Supplementary table S1.** Summary of Illumina sequencing. Sequencing data was aligned to mm9 using TopHat (RNA-seq [Ribozero]), Bowtie (DNase-seq) or STAR (RNA-seq [PolyA], DNase-seq and ChIP-seq). RNA-seq, PolyA represents RNA-seq data from polyA-enriched RNA. RNA-seq, Ribozero represents RNA-seq data produced from RNA-depleted ribosomal RNA.

| <b>Sample ID</b>       | <b>Method</b>     | <b>Uniquely aligned reads</b> |
|------------------------|-------------------|-------------------------------|
| <b>Chow, rep1</b>      | RNA-seq, PolyA    | 11720171                      |
| <b>Chow, rep2</b>      | RNA-seq, PolyA    | 11783129                      |
| <b>Chow, rep3</b>      | RNA-seq, PolyA    | 10588812                      |
| <b>HFD, rep1</b>       | RNA-seq, PolyA    | 10369184                      |
| <b>HFD, rep2</b>       | RNA-seq, PolyA    | 10279207                      |
| <b>HFD, rep3</b>       | RNA-seq, PolyA    | 7455851                       |
| <b>HFD-chow, rep1</b>  | RNA-seq, PolyA    | 11438832                      |
| <b>HFD-chow, rep2</b>  | RNA-seq, PolyA    | 11224943                      |
| <b>HFD-chow, rep3</b>  | RNA-seq, PolyA    | 14074351                      |
| <b>Chow-chow, rep1</b> | RNA-seq, PolyA    | 11927319                      |
| <b>Chow-chow, rep2</b> | RNA-seq, PolyA    | 11897382                      |
| <b>Chow-chow, rep3</b> | RNA-seq, PolyA    | 9777484                       |
| <b>Chow, rep1</b>      | RNA-seq, Ribozero | 49261677                      |
| <b>Chow, rep2</b>      | RNA-seq, Ribozero | 50060785                      |
| <b>Chow, rep3</b>      | RNA-seq, Ribozero | 51125127                      |
| <b>HFD, rep1</b>       | RNA-seq, Ribozero | 55636861                      |
| <b>HFD, rep2</b>       | RNA-seq, Ribozero | 43146179                      |
| <b>HFD, rep3</b>       | RNA-seq, Ribozero | 39882859                      |
| <b>Chow, rep1</b>      | DNase-seq 40U     | 11751937                      |
| <b>Chow, rep2</b>      | DNase-seq 40U     | 13081505                      |
| <b>HFD, rep1</b>       | DNase-seq 40U     | 11496699                      |
| <b>HFD, rep2</b>       | DNase-seq 40U     | 13026425                      |
| <b>Chow, rep1</b>      | DNase-seq 60U     | 30797401                      |
| <b>Chow, rep2</b>      | DNase-seq 60U     | 28945099                      |
| <b>HFD, rep1</b>       | DNase-seq 60U     | 35524039                      |
| <b>HFD, rep2</b>       | DNase-seq 60U     | 33956408                      |
| <b>Chow, rep1</b>      | H3K27Ac ChIP-seq  | 15077420                      |
| <b>Chow, rep2</b>      | H3K27Ac ChIP-seq  | 14388057                      |
| <b>Chow, rep3</b>      | H3K27Ac ChIP-seq  | 12629852                      |
| <b>HFD, rep1</b>       | H3K27Ac ChIP-seq  | 10621099                      |
| <b>HFD, rep2</b>       | H3K27Ac ChIP-seq  | 13060025                      |
| <b>HFD, rep3</b>       | H3K27Ac ChIP-seq  | 7298490                       |
| <b>HFD-chow, rep1</b>  | H3K27Ac ChIP-seq  | 11659004                      |
| <b>HFD-chow, rep2</b>  | H3K27Ac ChIP-seq  | 12156868                      |
| <b>HFD-chow, rep3</b>  | H3K27Ac ChIP-seq  | 12057716                      |
| <b>Chow-chow, rep1</b> | H3K27Ac ChIP-seq  | 11053602                      |
| <b>Chow-chow, rep2</b> | H3K27Ac ChIP-seq  | 11411917                      |
| <b>Chow-chow, rep3</b> | H3K27Ac ChIP-seq  | 12211452                      |

**Supplementary table S2.** Gene ontology analysis using PANTHER.  
Overrepresentation test using Bonferroni correction for multiple testing.

| <b>PANTHER GO-Slim Biological Process</b>                   | <b>Fold Enrichment</b> | <b>P-value</b> |
|-------------------------------------------------------------|------------------------|----------------|
| <b>Lipid metabolic process (GO:0006629)</b>                 | 5.01                   | 1.08E-14       |
| <b>Steroid metabolic process (GO:0008202)</b>               | 7.79                   | 2.35E-10       |
| <b>Fatty acid metabolic process (GO:0006631)</b>            | 6.91                   | 2.15E-09       |
| <b>Sensory perception of chemical stimulus (GO:0007606)</b> | < 0.2                  | 9.21E-05       |
| <b>Cholesterol metabolic process (GO:0008203)</b>           | 7.61                   | 9.55E-04       |
| <b>Metabolic process (GO:0008152)</b>                       | 1.39                   | 1.18E-03       |
| <b>Sensory perception of smell (GO:0007608)</b>             | < 0.2                  | 4.06E-03       |
| <b>Primary metabolic process (GO:0044238)</b>               | 1.39                   | 1.21E-02       |
| <b>Neurological system process (GO:0050877)</b>             | 0.33                   | 1.78E-02       |
| <b>Sensory perception (GO:0007600)</b>                      | 0.23                   | 1.94E-02       |
| <b>Cellular amino acid metabolic process (GO:0006520)</b>   | 3.45                   | 5.92E-02       |
| <b>Gluconeogenesis (GO:0006094)</b>                         | 13.22                  | 6.51E-02       |
| <b>Anion transport (GO:0006820)</b>                         | 2.97                   | 5.74E-01       |

**Supplementary table S3.** Reactome curated pathway analysis.

| <b>Reactome pathway analysis</b>                               | <b>FDR</b>  |
|----------------------------------------------------------------|-------------|
| <b>Activation of gene expression by SREBF (SREBP)</b>          | 6.18E-08    |
| <b>Regulation of cholesterol biosynthesis by SREBP (SREBF)</b> | 9.27E-07    |
| <b>Circadian Clock</b>                                         | 0.001020081 |
| <b>Fatty acid, triacylglycerol, and ketone body metabolism</b> | 0.001020081 |
| <b>Unwinding of DNA</b>                                        | 0.017989684 |
| <b>Fatty Acyl-CoA Biosynthesis</b>                             | 0.017989684 |
| <b>Mitotic G1-G1/S phases</b>                                  | 0.018982142 |
| <b>ChREBP activates metabolic gene expression</b>              | 0.034287085 |
| <b>Triglyceride Biosynthesis</b>                               | 0.037763381 |
| <b>PPARA activates gene expression</b>                         | 0.040182535 |

## Supplementary figure S4

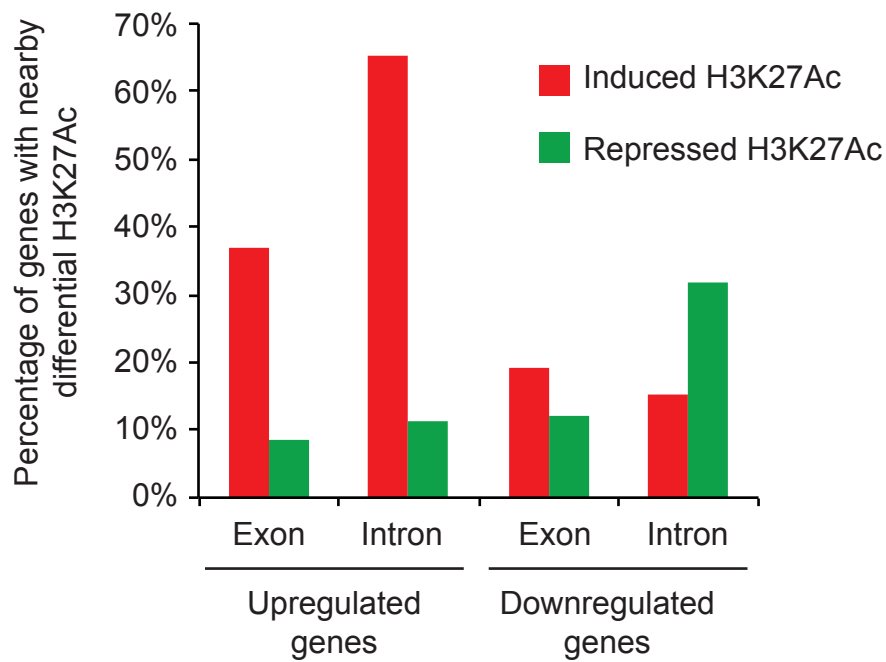

**Supplementary figure S4.** Frequency of HFD-induced up- and downregulated genes with nearby accessible regions that are differentially acetylated at H3K27 by HFD. Induced H3K27Ac is marked green and reduced H3K27Ac is marked red. Accessible regions within 100kb of the transcriptional start sites were selected for analysis. Differential gene expression was calculated using in intron or exon reads.

## Supplementary figure S5

**a**

Motifs in regions with HFD-regulated DHS and increased H3K27Ac

| Factor | Top 10 most enriched known motifs | p-val  | %target/backgr |
|--------|-----------------------------------|--------|----------------|
| HNF4   |                                   | 1e-104 | 32/10          |
| C/EBP  |                                   | 1e-61  | 28/11          |
| ERRA   |                                   | 1e-42  | 61/41          |
| PPAR   |                                   | 1e-35  | 35/19          |
| FOXA   |                                   | 1e-30  | 37/22          |
| ATF4   |                                   | 1e-29  | 13/4           |
| NFY    |                                   | 1e-27  | 27/15          |
| SREBP  |                                   | 1e-23  | 11/4           |
| HNF1   |                                   | 1e-22  | 7/2            |
| ATF1   |                                   | 1e-21  | 21/12          |

**b**

■ Random DHS 
 ■ Increased H3K27Ac 
 ■ Reduced H3K27Ac

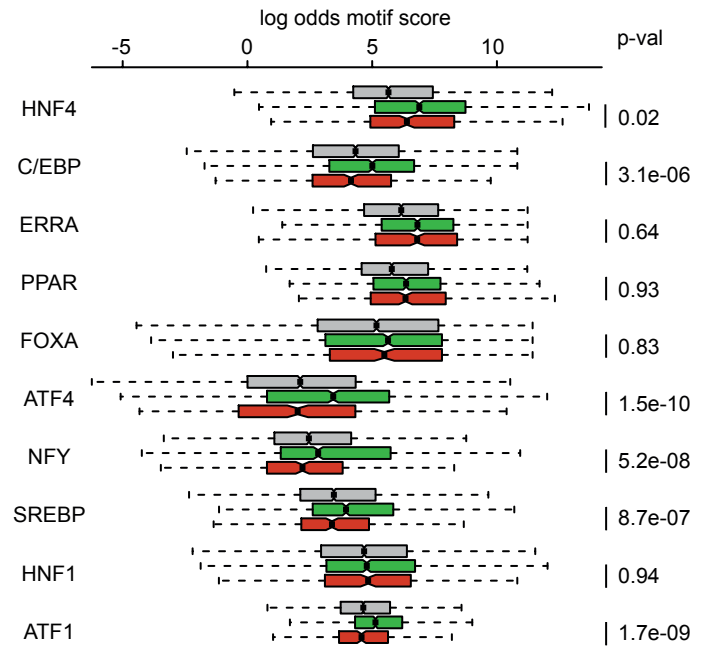

**Supplementary figure S5.** DNA motif analysis of HFD-regulated enhancers. **a)** DNA-sequence at DNase accessible regions with differentially regulated H3K27Ac by HFD was extracted and subjected to enriched motif analysis by HOMER. Top 10 of the most enriched known motifs. **b)** Motif strength of the most enriched motifs curated by HOMER at regions with either increased (green) or decreased (red) H3K27Ac or randomly selected DNase accessible regions (grey). Statistical test was performed by Wilcoxon signed-rank test.

## Supplementary figure S6

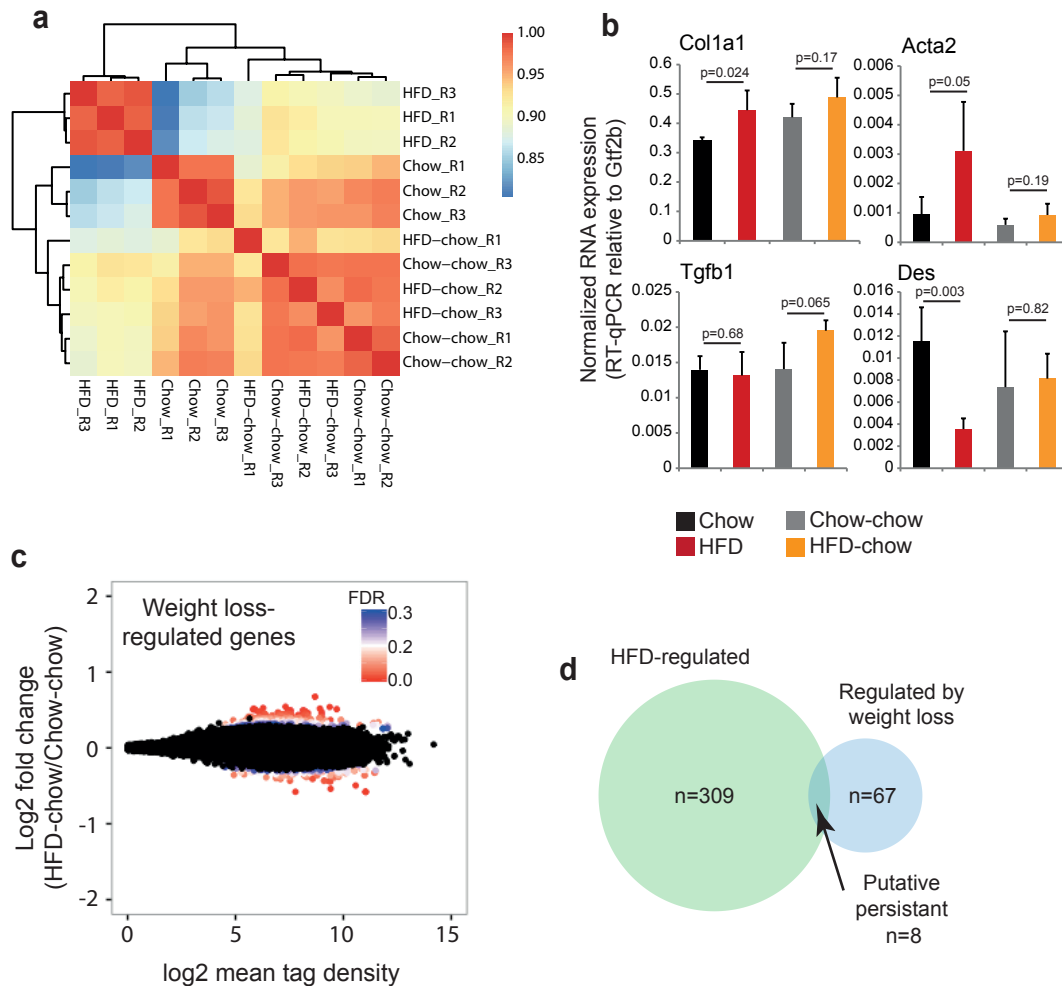

**Supplementary figure S6. a)** Pairwise correlation analysis (Pearson) of RNA-seq replicates from Chow, HFD, HFD-chow and Chow-chow feeding regimens. RNA-seq data was generated from polyA-enriched RNA. Pairwise correlation analysis was clustered using euclidian distance computation. Heatmap shows Pearson correlation coefficient. **b)** Expression of genes associated with hepatic fibrosis measured by RT-qPCR (n=3-4). Statistical test was performed by two-tailed t-test. Error bars represent SEM. **c)** Differential RNA expression (RNA-seq) in livers isolated from Chow-chow compared to HFD-chow treated mice. DESeq2 was used to compute FDR. FDR>0.3 is colored black, while FDR<0.3 is colored according to the heatmap. Red represents most significantly regulated genes. **d)** Unique and common regulated genes by HFD and genes regulated as a result of weight loss. Differentially regulated genes are scored at FDR<0.05 computed by DESeq2. Common regulated genes (8 in total) represents putative persistent regulated genes as a result of HFD.

## Supplementary figure S7

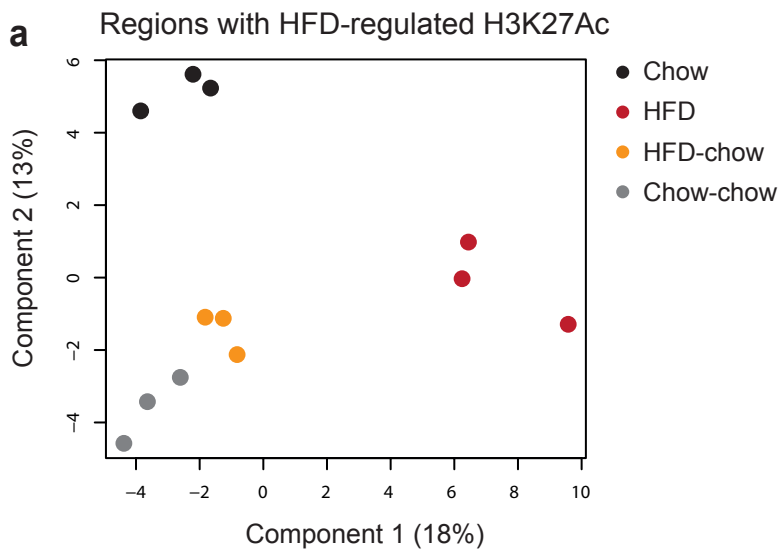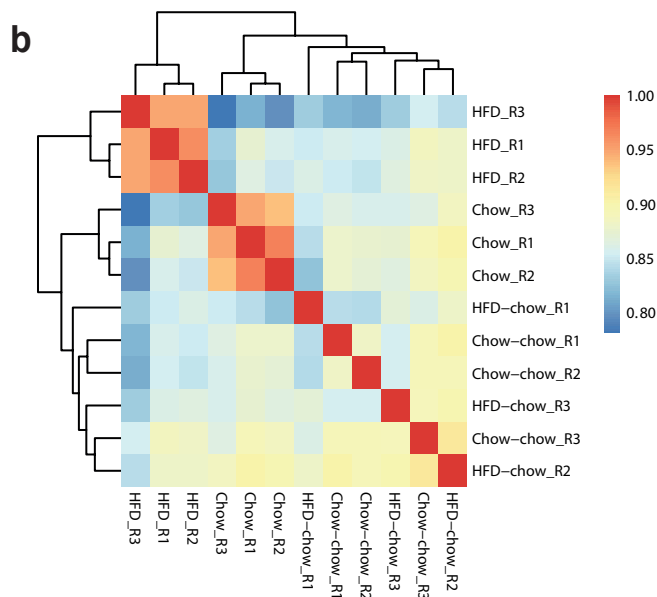

**Supplementary figure S7. a)** Principle component analysis and **b)** Pearson pairwise correlation analysis of H3K27Ac ChIP-seq replicates. Analysis was performed on regions demonstrating differential H3K27Ac in response to HFD ( $p < 0.05$ ). Pairwise correlation analysis was clustered using euclidean distance computation. Heatmap shows Pearson correlation coefficient.
